# Supplementary material
Source: MDPI journal article supplement (https://www.mdpi.com/2073-4395/11/2/302)
Supplement: s1 [file s1]

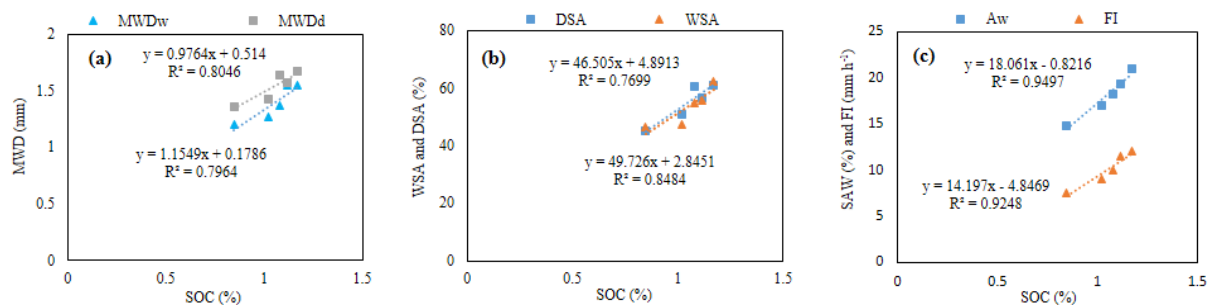

**Figure S1.** The regression between soil organic carbon with soil mean weigh diameter (MWDW,MWD d) (a), wet and dry stable aggregates (WSA,DSA) (b), soil available water (SAW), and soil final infiltration (FI) (c) in the CT system

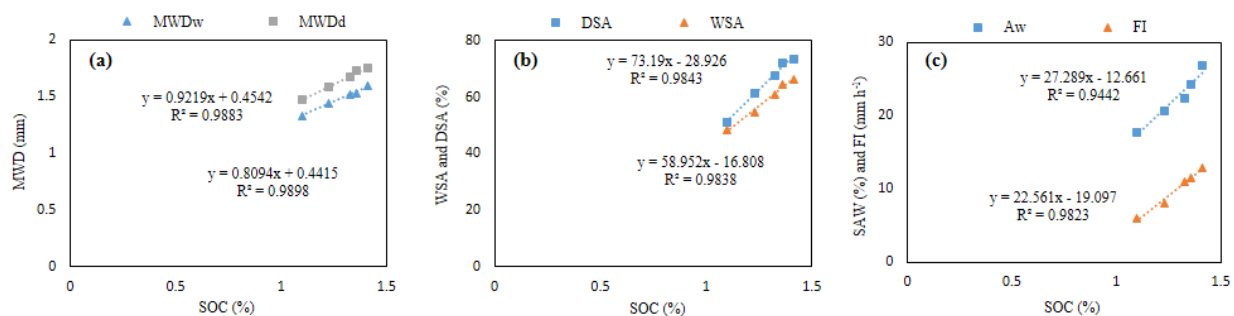

**Figure S2.** The regression between soil organic carbon with soil mean weigh diameter (MWDW,MWD d) (a), wet and dry stable aggregates (WSA,DSA) (b), soil available water (SAW), and soil final infiltration (FI) (c) in the NT system

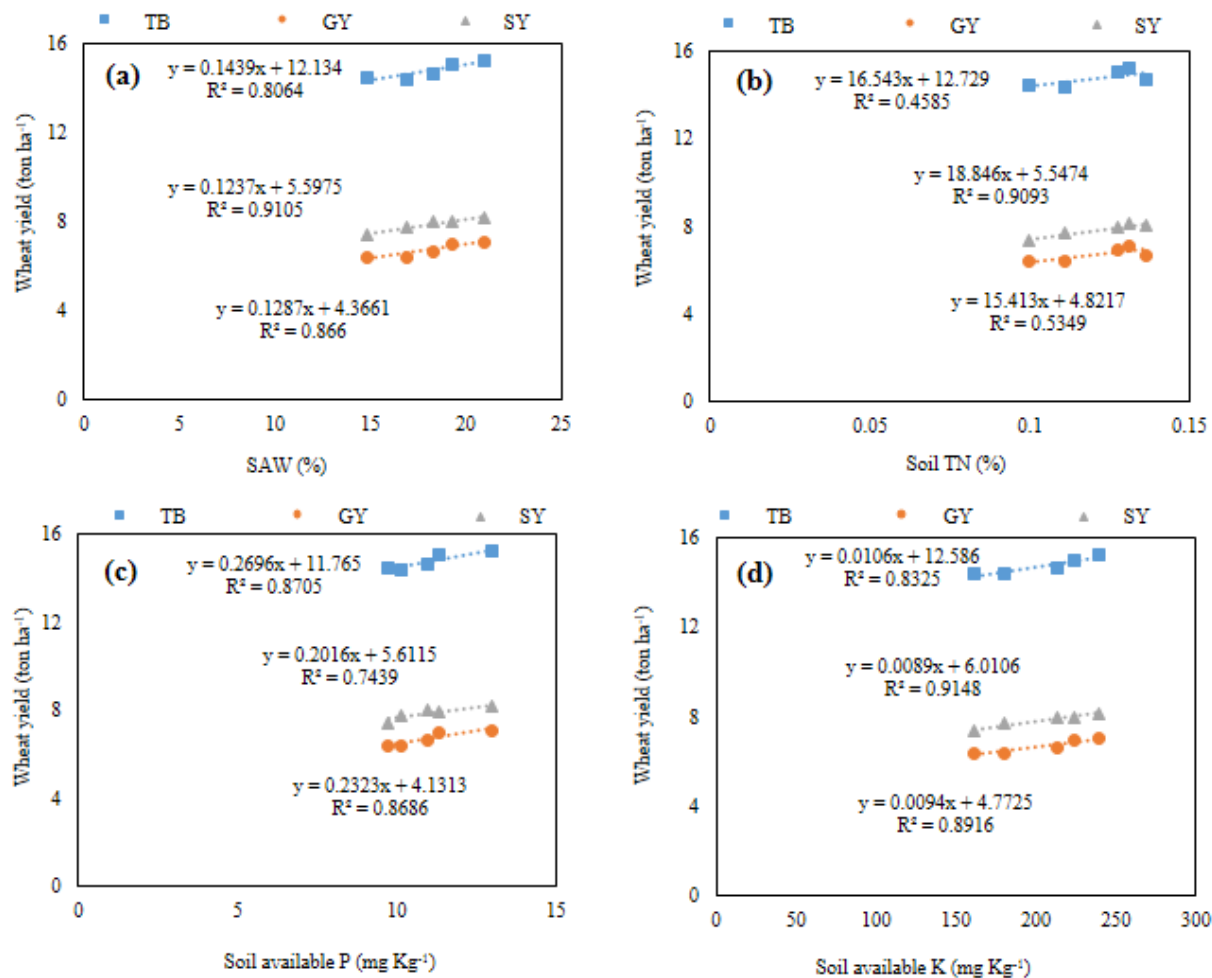

**Figure S3.** The regression between wheat total biomass (TB), grain yield (GY), straw yield (SY) with soil available water (SAW) (a), soil total nitrogen (b), soil available phosphorous (c), soil available potassium (d) in the CT system

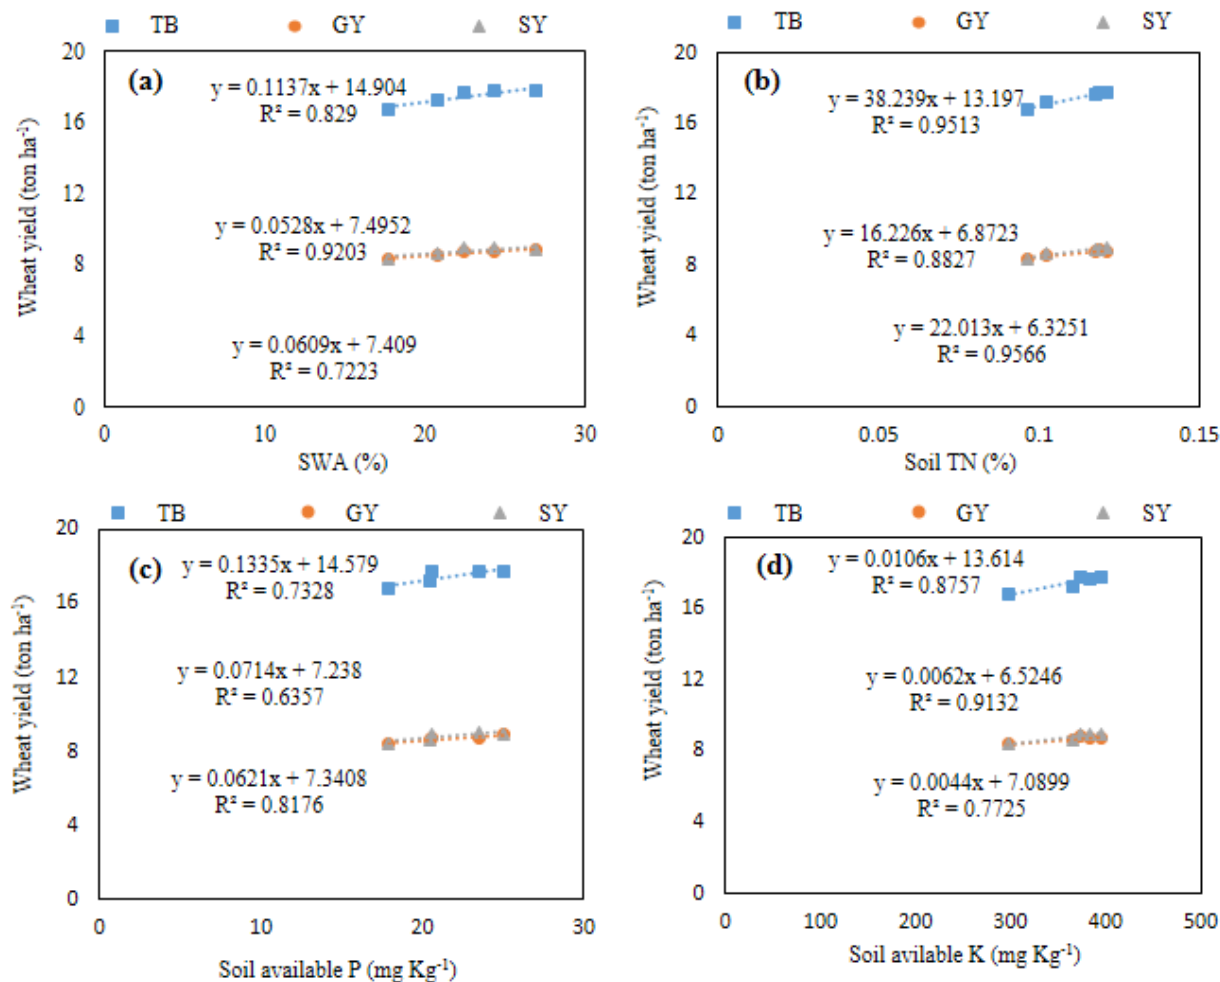

**Figure S4.** The regression between wheat total biomass (TB), grain yield (GY), straw yield (SY) with soil available water (SAW) (a), soil total nitrogen (b), soil available phosphorous (c), soil available potassium (d) in the NT system
